# Supplementary material for: Systematic Review, Meta-Analysis and Radiomics Quality Score Assessment of CT Radiomics-Based Models Predicting Tumor EGFR Mutation Status in Patients with Non-Small-Cell Lung Cancer
Source: MDPI journal article supplement (doi:10.3390/ijms241411433), 2023-07-14
Supplement: s1 [file s1]

Supplementary Materials:

Table S1. Detailed description of each article included

| Reference (APA 7th format)                                                                                                                                                                                                            | First autor   | Year | Number of radiomics features | Features selection method                                          | Model                                                                    | Study | Metrics/ Performance                                                                                                                            | Data base size | Ground thruth                                                                                                            | Histology                      |
|---------------------------------------------------------------------------------------------------------------------------------------------------------------------------------------------------------------------------------------|---------------|------|------------------------------|--------------------------------------------------------------------|--------------------------------------------------------------------------|-------|-------------------------------------------------------------------------------------------------------------------------------------------------|----------------|--------------------------------------------------------------------------------------------------------------------------|--------------------------------|
| Agazzi, G et al. (2021). CT texture analysis for prediction of EGFR mutational status and ALK rearrangement in patients with non-small cell lung cancer. Radiologia Medica                                                            | Agazzi, G     | 2021 | Not available (only texture) | SMOTE                                                              | GBM with a nested cross-validation approach                              | R     | Median accuracy: 81.76% [95% CI 81.45–82.06]                                                                                                    | 84             | Segmentation: radiologists<br>EGFR: direct sequencing                                                                    | Adenocarcinoma<br>Metastatisis |
| Dang, Y., et al. (2021). Clinical and radiological predictors of epidermal growth factor receptor mutation in nonsmall cell lung cancer. Journal of Applied Clinical Medical Physics                                                  | Dang, Y       | 2021 | 1287                         | Mann-Whitney U test<br>Spearman CC<br>RF based Boruta algorithm    | Rad-Score calculated with respective weighted coefficients by using a LR | R     | ROC AUC of 0.798 (95% CI: 0.664 to 0.931)                                                                                                       | 132            | Segmentation: radiologists<br>EGFR: not mentioned (EGFR mutations identified on 4 tyrosine kinase domains (exons 18–21)) | SCC                            |
| Digumarthy, S. et al. (2019). Can CT radiomic analysis in NSCLC predict histology and EGFR mutation status? Medicine                                                                                                                  | Digumarthy, S | 2019 | 11                           | Not mentionned                                                     | Not used (multivariable logistic regression for assessment)              | R     | Radiomic features (kurtosis, K2) [ROC AUC 0.656–0.713, P = .03 to .003];<br>radiomics, clinical & imaging features : (ROC AUC 0.890, P < .0001) | 93             | Segmentation: radiologists<br>EGFR: not mentioned (EGFR mutations identified on 4 tyrosine kinase domains (exons 18–21)) | SCC                            |
| Dong, Y., et al. (2022). Development and validation of novel radiomics-based nomograms for the prediction of EGFR mutations and Ki-67 proliferation index in non-small cell lung cancer. Quantitative Imaging in Medicine and Surgery | Dong, Y       | 2022 | 638                          | Wilkinson's ICC (intraclass correlation coefficient)               | LASSO logistic regression analysis                                       | R     | ROC AUC : 0.786 (95% CI: 0.621-0.95)                                                                                                            | 118            | Segmentation: radiologists<br>EGFR: PCR                                                                                  | SCC                            |
| He, R., et al. (2022). A Machine Learning-Based Predictive Model of Epidermal Growth Factor Mutations in Lung Adenocarcinomas. Cancers                                                                                                | He, R         | 2022 | 622                          | PCA<br>LASSO                                                       | K-nearest neighbor, RF, LGBM, SVM                                        | R     | ROC AUCs : RF 0.66±0.06; KNN 0.62±0.05; SVC = 0.67±0.04; LGBM model = 0.66±0.07                                                                 | 758            | Segmentation: radiologists<br>EGFR: direct sequencing                                                                    | Adenocarcinoma                 |
| Hong, D., et al. (2020). Radiomics Signature as a Predictive Factor for EGFR Mutations in Advanced Lung Adenocarcinoma. Frontiers in Oncology                                                                                         | Hong, D.      | 2020 | 396                          | LASSO                                                              | LR                                                                       | R     | ROC AUC : 0.851 (95% CI, 0.750 to 0.951)                                                                                                        | 201            | Segmentation: radiologists<br>EGFR: PCR                                                                                  | Adenocarcinoma                 |
| Jia, T. Y., et al. (2019). Identifying EGFR mutations in lung adenocarcinoma by noninvasive imaging using radiomics features and random forest modeling. European Radiology                                                           | Jia, T        | 2019 | 440                          | pvalue of each feature in the training cohort (performance driven) | EF classifiers                                                           | R     | ROC AUC: 0.802. ROC AUC further improved to 0.828 by adding sex & smoking history. Se & sp: 60.6% & 85.1% at the best diagnostic decision point | 503            | Segmentation: radiologists<br>EGFR: PCR                                                                                  | Adenocarcinoma                 |

| Reference (APA 7th format)                                                                                                                                                                                                                      | First autor | Year | Number of radiomics features | Features selection method                                                                                                        | Model                                    | Study | Metrics/ Performance                                                                                                                                                                                                                                                                                                                              | Data base size | Ground thruth                                                                                                             | Histology                                                    |
|-------------------------------------------------------------------------------------------------------------------------------------------------------------------------------------------------------------------------------------------------|-------------|------|------------------------------|----------------------------------------------------------------------------------------------------------------------------------|------------------------------------------|-------|---------------------------------------------------------------------------------------------------------------------------------------------------------------------------------------------------------------------------------------------------------------------------------------------------------------------------------------------------|----------------|---------------------------------------------------------------------------------------------------------------------------|--------------------------------------------------------------|
| Jiang, M., et al. (2019). Assessing EGFR gene mutation status in non-small cell lung cancer with imaging features from PET/CT. Nuclear Medicine Communications                                                                                  | Jiang, M    | 2019 | 512                          | LASSO                                                                                                                            | SVM 10-fold cross validation             | R     | ROC AUC of predicting results for 31 (18 for CT & 13 for PET) quantitative results 0.833 (95% CI: 0.74–0.93), counterpart to ROC AUC of outcomes for 4 qualitative features 0.731 (95% CI: 0.62–0.85). When quantitative features combining qualitative features: ROC AUC of predicting results for the whole 35 features: 0.953 (95% CI: 0.88–1) | 80             | Segmentation: radiologists<br>EGFR: PCR                                                                                   | SCC                                                          |
| Koyasu, S., et al. (2020). Usefulness of gradient tree boosting for predicting histological subtype and EGFR mutation status of non-small cell lung cancer on 18F FDG-PET/CT. Annals of Nuclear Medicine                                        | Koyasu, S   | 2020 | 7 type (not mentioned)       | Not mentioned                                                                                                                    | RF classifiers<br>Gradient tree boosting | R     | ROC AUC values: RF, single type: 0.625; XGB, single type: 0.617; RF, multiple types: 0.577; XGB, multiple types: 0.659.                                                                                                                                                                                                                           | 138            | Public database                                                                                                           | SCC                                                          |
| Le, N. Q. et al. (2021). Machine learning-based radiomics signatures for egfr and kras mutations prediction in non-small-cell lung cancer. International Journal of Molecular Sciences                                                          | Le, N       | 2021 | 851                          | Univariate selection, RFE, Feature importance, Filter methods, F-score, GA, minimum redundancy feature selection KBest algorithm | kNN, LR, RF, XGBoos                      | R     | ROC AUC : 0.89                                                                                                                                                                                                                                                                                                                                    | 161            | Public database                                                                                                           | SCC                                                          |
| Li, S., et al. (2019). Radiomics for the prediction of EGFR mutation subtypes in non-small cell lung cancer. Medical Physics                                                                                                                    | Li, S       | 2019 | 580                          | Not mentioned                                                                                                                    | LR 5-fold cross validation               | R     | ROC AUC: 0.7925                                                                                                                                                                                                                                                                                                                                   | 312            | Segmentation: radiologists<br>EGFR: PCR mutations in EGFR exons 18 or 20, or simultaneous mutations in EGFR exons 19 & 21 | SCC                                                          |
| Li, X. et al. (2018). Detection of epithelial growth factor receptor (EGFR) mutations on CT images of patients with lung adenocarcinoma using radiomics and/or multi-level residual convolutionary neural networks. Journal of Thoracic Disease | Li, X       | 2018 | Not mentioned                | RF classifiers                                                                                                                   | Multi-level residual CNNs based model    | R     | ROC AUC : 0.74 CI 0.670 0.811                                                                                                                                                                                                                                                                                                                     | 1010           | Segmentation: radiologists<br>EGFR: PCR                                                                                   | Adenocarcinoma                                               |
| Liu, Y. et al. (2016). Radiomic Features Are Associated With EGFR Mutation Status in Lung Adenocarcinomas. Clinical Lung Cancer                                                                                                                 | Liu, Y.     | 2016 | Not mentioned                | Not mentioned                                                                                                                    | multiple LR                              | R     | ROC AUC : 0.667(95% CI, 0.604-0.721)                                                                                                                                                                                                                                                                                                              | 298            | Segmentation: radiologists<br>EGFR: PCR                                                                                   | Adenocarcinoma                                               |
| Liu, Y et al. (2022). Development and Validation of Machine Learning Models to Predict Epidermal Growth Factor Receptor Mutation in Non-Small Cell Lung Cancer: A Multi-Center Retrospective Radiomics Study. Cancer Control                    | Liu, Y.     | 2022 | 1085                         | Intraclass correlation coefficient, hypothesis tests and LASSO.                                                                  | LR, DT, RF, SVM                          | R     | ROC AUC: .88, 95% CI: .75-.946                                                                                                                                                                                                                                                                                                                    | 346            | Segmentation: cardiothoracic disease<br>imaging physicians<br>EGFR: not mentioned                                         | SCC; Large cell carcinoma<br>pulmonary sarcomatoid carcinoma |

| Reference (APA 7th format)                                                                                                                                                                                      | First autor | Year | Number of radiomics features                                                      | Features selection method                               | Model                             | Study | Metrics/ Performance                                                                                                                                                                                                               | Data base size | Ground thruth                                      | Histology            |
|-----------------------------------------------------------------------------------------------------------------------------------------------------------------------------------------------------------------|-------------|------|-----------------------------------------------------------------------------------|---------------------------------------------------------|-----------------------------------|-------|------------------------------------------------------------------------------------------------------------------------------------------------------------------------------------------------------------------------------------|----------------|----------------------------------------------------|----------------------|
| Lu, L et al. (2020). Radiomics prediction of egfr status in lung cancer—our experience in using multiple feature extractors and the cancer imaging archive data. Tomography                                     | Lu, L       | 2020 | IBEX (1563 features) & Pyradiomics (1319 f.), & in-house software, CIFE (1160 f.) | Included in the model                                   | KNN, SVM, LASSO, RF bagging       | R     | IBEX, Pyradiomics, and CIFE yielded similar areas under the ROC of 0.68, 0.67, & 0.69. However, in validation, areas under the ROC of multivariate prediction models from IBEX, Pyradiomics, & CIFE decreased to 0.54, 0.56 & 0.64 | 228            | Public database                                    | SCC                  |
| Nair, J. et al. (2021). Radiogenomic Models Using Machine Learning Techniques to Predict EGFR Mutations in Non-Small Cell Lung Cancer. Canadian Association of Radiologists Journal                             | Nair, J     | 2021 | 326                                                                               | LR                                                      | LR                                | R     | 0.8307+/-0.07                                                                                                                                                                                                                      | 50             | Segmentation: radiologists<br>EGFR: PCR            | Adenocarcinoma       |
| Ninomiya, K et al. (2021). Robust radiogenomics approach to the identification of EGFR mutations among patients with NSCLC from three different countries using topologically invariant Betti numbers. PLoS ONE | Ninomiya, K | 2021 | 52                                                                                | Not mentioned                                           | SVM 5-fold cross validation       | R     | 0.86(0.78–0.93                                                                                                                                                                                                                     | 194            | Segmentation: radiologists<br>EGFR: PCR            | SCC                  |
| Rossi, G et al. (2021). Radiomic Detection of EGFR Mutations in NSCLC. Cancer Research                                                                                                                          | Rossi, G    | 2021 | 104                                                                               | Variation test-retest PCA                               | SVM                               | R     | ROC AUC : 0.85                                                                                                                                                                                                                     | 109            | Segmentation: radiologists<br>EGFR: PCR            | SCC                  |
| Shiri, I., et al. (2022). Impact of feature harmonization on radiogenomics analysis: Prediction of EGFR and KRAS mutations from non-small cell lung cancer PET/CT images. Computers in Biology and Medicine     | Shiri, I    | 2022 | 218                                                                               | ML-based feature selection (not specified)              | RF                                | R     | ROC AUCs 0.92–0.94 for EGFR                                                                                                                                                                                                        | 136            | Public database                                    | SCC                  |
| Tu, W et al. (2019). Radiomics signature: A potential and incremental predictor for EGFR mutation status in NSCLC patients, comparison with CT morphology. Lung Cancer                                          | Tu, W.      | 2019 | 234                                                                               | ICCs, Mann-Whitney U, Unsupervised consensus clustering | Multivariable logistic regression | R     | ROC AUC 0.775 (0.703-0.847)                                                                                                                                                                                                        | 404            | Segmentation: radiologists<br>EGFR: not mentioned  | NSCLC (no precision) |
| Li, X., et al. (2019). Predictive Power of a Radiomic Signature Based on. Front Oncol                                                                                                                           | Li,X        | 2019 | 38                                                                                | LASSO                                                   | LASSO                             | R     | ROC AUC (95%CI) = 0.83 (0.68, 0.92)                                                                                                                                                                                                | 115            | Segmentation: radiologists<br>EGFR: PCR            |                      |
| Li, Y., et al. (2018). CT Slice Thickness and Convolution Kernel Affect Performance of a Radiomic Model for Predicting EGFR Status in Non-Small Cell Lung Cancer: A Preliminary Study. Scientific reports       | LI,Y        | 2018 | 1695                                                                              | SVM                                                     | CCC                               | R     | 0.83 (0.68, 0.92)                                                                                                                                                                                                                  | 51             | Segmentation: radiologists<br>EGFR: PCR            | Adenocarcinoma       |
| Wang, C., et al. (2022). Predicting EGFR and PD-L1 Status in NSCLC Patients Using Multitask AI System Based on CT Images. Frontiers in Immunology                                                               | Wang, C     | 2022 | 1247                                                                              | LASSO                                                   | NLP                               | R     | ROC AUCs: DL 0.906(0.885-0.930)<br>Radiomics 0.860(0.816-0.902)<br>Joint 0.928(0.909-0.946)                                                                                                                                        | 3629           | Segmentation: Not mentioned<br>EGFR: not mentioned | SCC                  |

| Reference (APA 7th format)                                                                                                                                                                                         | First autor | Year | Number of radiomics features | Features selection method                                                                                                                                                                                                                | Model                                        | Study | Metrics/ Performance                                                                                                                                      | Data base size | Ground thruth                                | Histology                                                                                     |
|--------------------------------------------------------------------------------------------------------------------------------------------------------------------------------------------------------------------|-------------|------|------------------------------|------------------------------------------------------------------------------------------------------------------------------------------------------------------------------------------------------------------------------------------|----------------------------------------------|-------|-----------------------------------------------------------------------------------------------------------------------------------------------------------|----------------|----------------------------------------------|-----------------------------------------------------------------------------------------------|
| Yang, C et al. (2020). Application of CT radiomics features to predict the EGFR mutation status and therapeutic sensitivity to TKIs of advanced lung adenocarcinoma. Translational Cancer Research                 | Yang, C     | 2020 | 715                          | LASSO                                                                                                                                                                                                                                    | LR 10-fold cross validation                  | R     | ROC AUC values of the unenhanced, arterial & venous phases in the EGFR mutation status training group: 0.6713, 0.8194 & 0.8464                            | 253            | Segmentation: radiologists<br>EGFR: PCR ARMS | Adenocarcinoma                                                                                |
| Yang, L., et al. (2022). PET/CT Radiomic Features: A Potential Biomarker for EGFR Mutation Status and Survival Outcome Prediction in NSCLC Patients Treated With TKIs. Frontiers in Oncology                       | Yang, L     | 2022 | 1037                         | Univariate LR analysis to select features with P<0.05 for the subsequent analysis. Secondly, multivariate LR analysis applied to choose features closely related to different EGFR status. Informative features retained using the LASSO | SVM, DT, RF                                  | R     | ROC AUC of EGFR-WT, EGFR-19-WT, and EGFR-21-WT, with 0.881, 0.851, and 0.849, respectively, and validation ROC AUCs of 0.926, 0.805 & 0.859, respectively | 313            | Segmentation: radiologists<br>EGFR: PCR      | Adenocarcinoma                                                                                |
| Yang, X., et al. (2022). Using contrast-enhanced CT and non-contrast-enhanced CT to predict EGFR mutation status in NSCLC patients—a radiomics nomogram analysis. European Radiology                               | Yang, X     | 2022 | 1092                         | Mann-Whitney U test, Spearman CC, RF based Boruta algorithm                                                                                                                                                                              | ML methods included SVM, LR, RF, GBDT, & NBC | R     | 0.850 (0.608–1.000)                                                                                                                                       | 412            | Segmentation: radiologists<br>EGFR: PCR      | NSCLC (no precision)                                                                          |
| Zhang, J., et al. (2020). Value of pre-therapy 18F-FDG PET/CT radiomics in predicting EGFR mutation status in patients with non-small cell lung cancer. European Journal of Nuclear Medicine and Molecular Imaging | Zhang, J    | 2020 | 45                           | LASSO                                                                                                                                                                                                                                    | RF                                           | R     | 0.87 (95%CI [0.79–0.95])                                                                                                                                  | 248            | Segmentation: radiologists<br>EGFR: PCR      | Adenocarcinoma                                                                                |
| Zhang, L., et al. (2018). Quantitative Biomarkers for Prediction of Epidermal Growth Factor Receptor Mutation in Non-Small Cell Lung Cancer. Translational Oncology                                                | Zhang, L.   | 2028 | 485                          | LASSO                                                                                                                                                                                                                                    | A multivariable logistic regression          | R     | AUXC wkith and without clinical feartures0.62 to 0.85                                                                                                     | 180            | Segmentation: radiologists<br>EGFR: PCR      | Adenocarcinoma:<br>48.6% (68/140) of cases;<br>SCC: 38.6% (54/140);<br>others: 12.8% (18/140) |

CCC=Concordance correlation coefficient; CIFE=Columbia Image Feature Extractor; DT=decision tree; Feature Extractor; GBDT=gradient boosting decision tree; GBM=Generalized boosted regression model; ML=Machine learning; NBC=naïve Bayesian classification; LASSO=Least absolute shrinkage and selection operator; LR= logistic regression; R=retrospective; RF=Random forest; SCC=Squamous cell carcinoma; Se=Sensitivity; SMOTE=Synthetic minority oversampling technique; Sp=specificity; ; SVM=support vector machine; RFE=Recursive feature elimination; ROC=receiver operating characteristic curve; PCA=Principal component analysis
